# Supplementary material
Source: PubMed Central journal article supplement (PMC6351153)

## SUPPLEMENTARY MATERIAL

### **Elevated YKL-40 and low sAPP $\beta$ /YKL-40 ratio in ante-mortem cerebrospinal fluid of patients with pathologically-confirmed FTL D**

Daniel Alcolea<sup>1, 2</sup>, David J. Irwin<sup>3</sup>, Ignacio Illán-Gala<sup>1, 2</sup>, Laia Muñoz<sup>1, 2</sup>, Jordi Clarimón<sup>1, 2</sup>, Corey T. McMillan<sup>3</sup>, Juan Fortea<sup>1, 2</sup>, Rafael Blesa<sup>1, 2</sup>, Edward B. Lee<sup>4</sup>, John Q. Trojanowski<sup>4</sup>, Murray Grossman<sup>3</sup>, Alberto Lleó<sup>1, 2\*</sup>

1- Sant Pau Memory Unit, Department of Neurology, Institut d'Investigacions Biomèdiques Sant Pau - Hospital de Sant Pau, Universitat Autònoma de Barcelona, Barcelona, Spain

2- Centro de Investigación Biomédica en Red en Enfermedades Neurodegenerativas, CIBERNED, Spain

3- Penn FTD Center, Department of Neurology, Perelman School of Medicine at the University of Pennsylvania, Philadelphia, PA, USA.

4- Center for Neurodegenerative Disease Research, Department of Pathology and Laboratory Medicine, Perelman School of Medicine at the University of Pennsylvania, Philadelphia, PA, USA.

#### **\*Corresponding author:**

Alberto Lleó, MD PhD; Department of Neurology, Hospital Sant Pau, Sant Antoni Maria Claret, 167, 08025 Barcelona, Spain; Phone: +34935565986 – Fax: +34935565602  
Email: [alleo@santpau.es](mailto:alleo@santpau.es)

## Supplementary Figure 1 - Association of sAPP $\beta$ and YKL-40 in CSF with cerebral tau burden

The x axis is expressed as the logarithm of percentage of area occupation (AO%) by tau deposits. All analyses were adjusted by age and sex. The exclusion of one YKL-40 outlier did not change the results significantly.

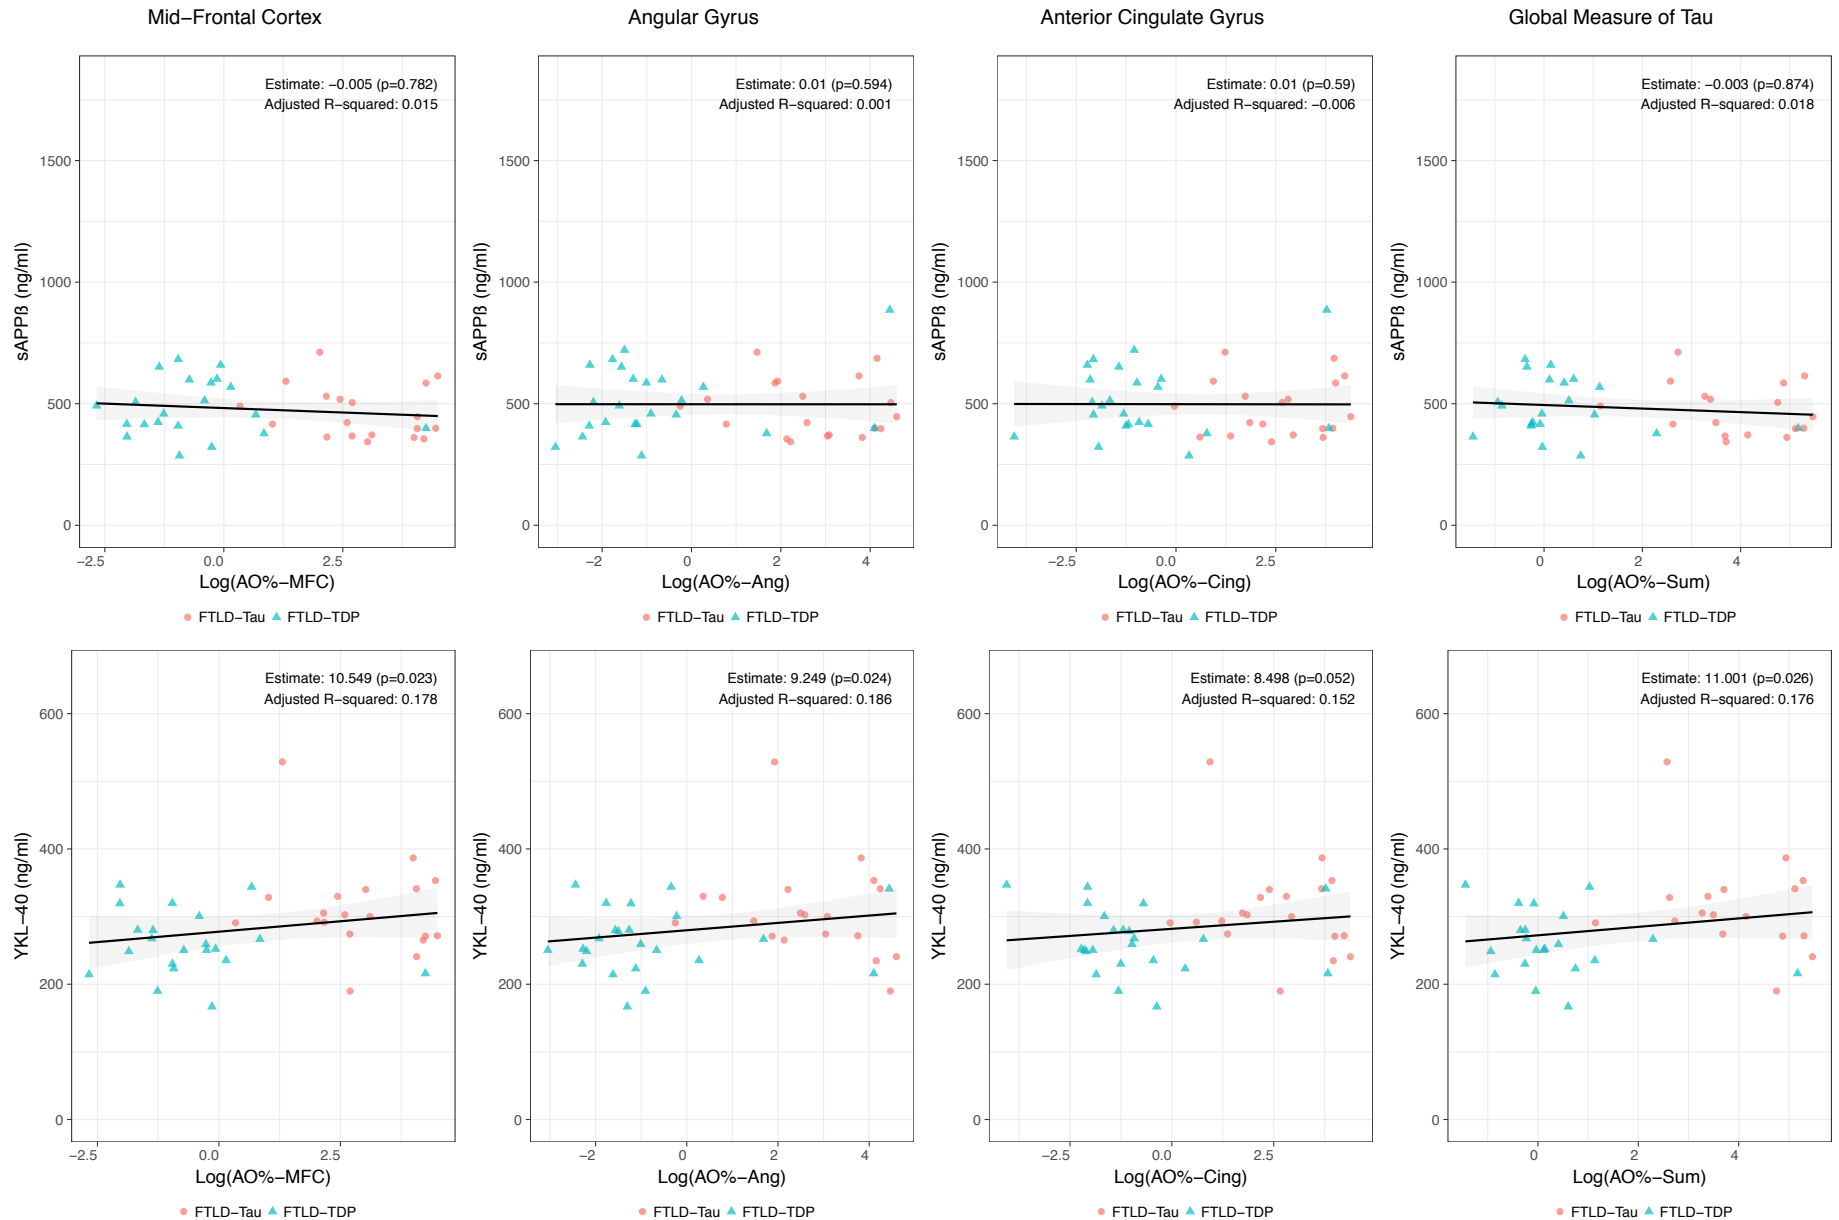

## Supplementary Figure 2 - Receiver operating characteristic (ROC) curves for the analysis of CSF biomarkers' diagnostic utility to distinguish FTLD-Tau and FTLD-TDP patients from controls

FTLD: frontotemporal lobar degeneration; AUC: area under the curve; df: degrees of freedom.

Only participants with no comorbid AD pathology were included in these analyses. Values are expressed as AUC (CI 95%).

Statistics of the comparison between ROC curves ("DeLong" method) are displayed in top-left corners

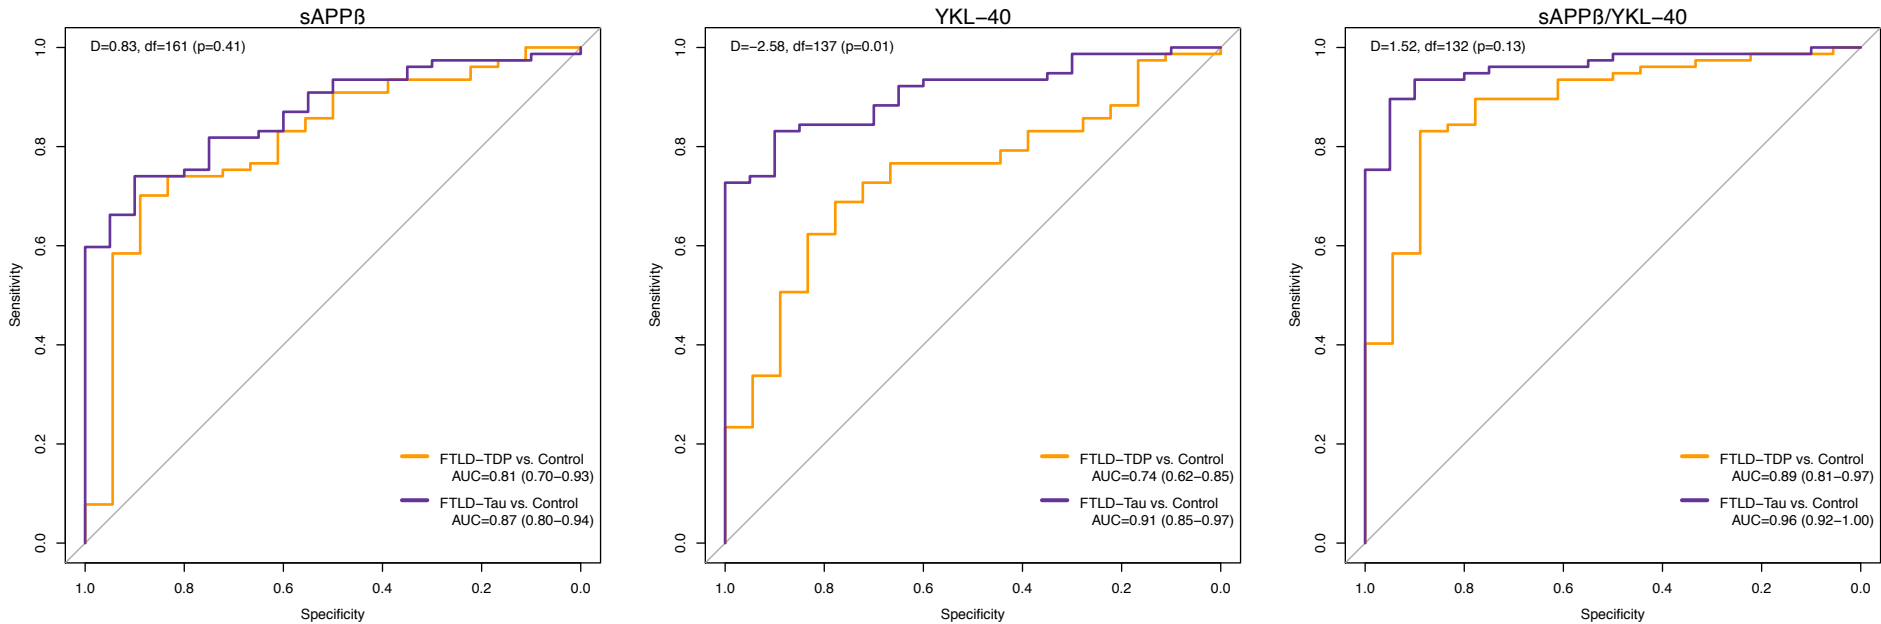

Supplement: NIHMS1000363-supplement-supplement.pdf [file NIHMS1000363-supplement-supplement.pdf]
